# Supplementary material for: Learning Styles Impact Students’ Perceptions on Active Learning Methodologies: A Case Study on the Use of Live Coding and Short Programming Exercises
Source: MDPI journal article supplement (doi:10.3390/educsci14030250), 2024-02-28
Supplement: s1 [file s1]

## OOP - Pedagogical Style Survey

1. **How would you qualify yourself before starting this course?**
    - ☐ Strong programmer
    - ☐ Good understanding of programming languages like C and javascript
    - ☐ Still learning, :)
  2. **How do you identify best yourself, as an active or as a reflective learner?**
    - ☐ Active learner
    - ☐ Reflective learner
  3. **In your opinion, have the short programming exercises we have been doing during the course been helpful for you to better understand the different concepts?**
    - ☐ Very helpful
    - ☐ Helpful
    - ☐ Not Helpful
    - ☐ Other:
  4. **Would you prefer to do the sort-programming exercises alone (with occasional discussion with the student sitting next to you) or in a group (4-5 students working together in the exercise)?**
    - ☐ I prefer doing the short programming exercises alone
    - ☐ I prefer doing the short programming exercises in groups
  5. **How do you identify best yourself, as an visual or as a verbal learner?**
    - ☐ Visual learner
    - ☐ Verbal learner
  6. **In your opinion, were the explanations of the solutions to the short programming exercises easy to follow for you?**
    - ☐ Yes
    - ☐ No
    - ☐ Other
  7. **Did you miss more slides-type-content complementing the short programming exercises?**
    - ☐ No
    - ☐ Sometimes
    - ☐ Yes
  8. **How do you identify best yourself, as an sensing or as a intuitive learner?**
    - ☐ Sensing learner
    - ☐ Intuitive learner
  9. **Did you miss more theoretical explanations about key concepts in OOP or more short-programming exercises?**
    - ☐ I missed more theoretical explanations about key concepts in OOP
    - ☐ I missed more short-programming exercises about key concepts in OOP
    - ☐ I missed both
    - ☐ I think it was a good balanced
    - ☐ Other:
  10. **How do you identify best yourself, as a sequential or as a global learner?**
    - ☐ Sequential learner
    - ☐ Global learner
  11. **In general, according to your previous answer, what did you miss in this course?**
-

**12. Which way of implementing this short programming exercises do you prefer?**

- ☐ Option A: Virtually no short-programming exercises. 2 hours lecturing + 2 hours exercises.
- ☐ Option B: 4 hours lecturing with a lot of short-programming exercises. No group exercises at the end of the session section.
- ☐ Option C: 3 hours lecturing with short programming exercises. 1 hour group exercise.
- ☐ Other:

**13. Which are the things you most like about this course?**

---



---



---



---

**14. Which are the things you least like about this course?**

---



---



---



---
